# Supplementary material for: The Antitumoral Effect In Ovo of a New Inclusion Complex from Dimethoxycurcumin with Magnesium and Beta-Cyclodextrin
Source: Preprints.org preprint supplement (doi:10.20944/preprints202403.0909.v1), 2024-03-15
Supplement: Supplementary file 1 [file supplementary]

The antitumoral effect *in ovo* of a new inclusion complex from dimethoxycurcumin with magnesium and beta-cyclodextrin

William Meza-Morales 1,†, Karla Daniela Rodríguez-Hernández 1,†, M. Mirian Estevez-Carmona 2, Leidys L. Pérez-González 1 Rosario Tavera-Hernández 1, María Teresa Ramírez-Apan 1, David Barrera-Hernández 3, Mitzi García-Olivares 3, Brian Monrroy-Torres 1, Antonio Nieto-Camacho 1, MaríaIsabel Chávez 1, Rubén Sanchez-Obregón 1, Marco A. Obregón-Mendoza 1,* and Raúl G. Enríquez 1,*

1. Instituto de Química, Universidad Nacional Autónoma de México, Ciudad de México 04510, México; william9023.wm@gmail.com (W.M.-M.); xandy411@comunidad.unam.mx (K.D.R.-H.); leidyslaura92@gmail.com (L.L.P.-G.); rosario.tavera@gmail.com (R.T.-H.); mtrapan@yahoo.com.mx (M.T.R.-A.); brianuami@gmail.com (B.M.-T.); camanico2015@yahoo.com (A.N.-C.); isabel@unam.mx (M.I.C.); rubens@unam.mx (R.S.-O.)
2. Departamento de Farmacia, Escuela Nacional de Ciencias Biológicas, Instituto Politécnico Nacional, M. Wilfrido Massieu SN, U. A. Zacatenco, Ciudad de México 07738, Mexico; mirianestevezc@gmail.com (M.M.E.-C.)
3. Departamento de Biología de la Reproducción “Dr. Carlos Gual Castro”, Instituto Nacional de Ciencias Médicas y Nutrición Salvador Zubirán, México, Ciudad de México, 14080, México; barrera1912@gmail.com (D.B.-H); mariol48@ciencias.unam.mx (M.G.-O)

***** Correspondence: marco.obregon@zaragoza.unam.mx (M.A.O.-M.); habib@unam.mx, enriquezhabib@gmail.com (R.G.E.); Tel.: +52-55562-24404

† These authors contributed equally to this work.

# Index

| **Fig S1.** 1H NMR spectrum of Dimethoxycurcumin-BF2 ( DiMeOC-BF2, 400 MHz, DMSO-*d*6). | 3 |
| --- | --- |
| **Fig S2.** 13C NMR spectrum of Dimethoxycurcumin-BF2 ( DiMeOC-BF2, 100 MHz, DMSO-*d*6). | 4 |
| **Fig S3.** IR Spectrum of DiMeOC-BF2. | 5 |
| **Fig S4.** Mass Spectrum of DiMeOC-BF2 (IE+). | 6 |
| **Fig S5.** 1H NMR spectrum of DiMeOC (400 MHz, DMSO- *d*6). | 7 |
| **Fig S6.** 13C NMR spectrum of DiMeOC (100 MHz, DMSO- *d*6). | 8 |
| **Fig S7.** UV-VIS spectrum in methanol of DiMeOC. | 9 |
| **Fig S8.** HPLC spectrum of DiMeOC (417nm, CH3CN/H2O (0.02% formic acid) 55:45). | 10 |
| **Fig S9.** Mass Spectrum of DiMeOC (DART+). | 11 |
| **Fig S10**. 1H NMR spectrum of DiMeOC-Mg (400 MHz, DMSO- *d*6). | 12 |
| **Fig S11.** 13C NMR spectrum of DiMeOC-Mg (100 MHz, DMSO-*d*6). | 13 |
| **Fig S12.**HSQC NMR spectrum of DiMeOC-Mg (400 MHz, DMSO-*d*6). | 14 |
| **Fig S13.** HMBC NMR spectrum of DiMeOC-Mg (400 MHz, DMSO-*d*6). | 15 |
| **Fig S14.** IR Spectrum of DiMeOC-Mg. | 16 |
| **Fig S15.** UV-VIS spectrum in methanol of DiMeOC-Mg . | 17 |
| **Fig S16.** HPLC spectrum of DiMeOC-Mg (417 nm, CH3CN/H2O (0.02% formic acid) 55:45). | 18 |
| **Fig S17.** Mass Spectrum of DiMeOC-Mg (MALDI-TOF). | 19 |
| **Fig S18**. 1H NMR spectrum of DiMeOC-Mg-BCD (400 MHZ, DMSO- *d*6). | 20 |
| **Fig S19.** 13C NMR spectrum of DiMeOC-Mg-BCD (100 MHz, DMSO-*d*6). | 21 |
| **Fig S20.**HSQC NMR spectrum of DiMeOC-Mg-BCD (400 MHz, DMSO-*d*6). | 22 |
| **Fig S21.** HMBC NMR spectrum of DiMeOC-Mg-BCD (400 MHz, DMSO-*d*6). | 23 |
| **Fig S22.** IR Spectrum of DiMeOC-Mg-BCD. | 24 |
| **Fig S23.** UV-VIS spectrum in methanol of DiMeOC-Mg-BCD . | 25 |
| **Fig S24.** HPLC spectrum of DiMeOC-Mg-BCD (417nm, CH3CN/H2O (0.02% formic acid) 55:45). | 26 |
| **Fig S25.** Mass Spectrum of DiMeOC-Mg-BCD (ESI). | 27 |
| **Fig S26.** Standard curve of DiMeOC-Mg (415nm, 1-Octanol). | 28 |
| **Fig S27.** Inclusion ratio DiMeOC-Mg and BCD (PBS media). | 29 |
| **Fig S28.** 1H NMR spectrum of Beta-cyclodextrin (BCD, 400 MHz, DMSO- *d*6). | 30 |
| **Fig S29.** 13C NMR spectrum of BCD (100 MHz, DMSO-*d*6). | 31 |
| **Fig S30.**HSQC NMR spectrum of BCD (500 MHz, DMSO-*d*6). | 32 |
| **Fig S31.** HMBC NMR spectrum of BCD (500 MHz, DMSO-*d*6). | 33 |
| **Fig S32.** IR Spectrum of BCD. | 34 |

# **Fig S1.** 1H NMR spectrum of Dimethoxycurcumin-BF2 ( DiMeOC-BF2, 400 MHz, DMSO-*d*6).

#

#

# **Fig S2.** 13C NMR spectrum of Dimethoxycurcumin-BF2 ( DiMeOC-BF2, 100 MHz, DMSO-*d*6).

# **
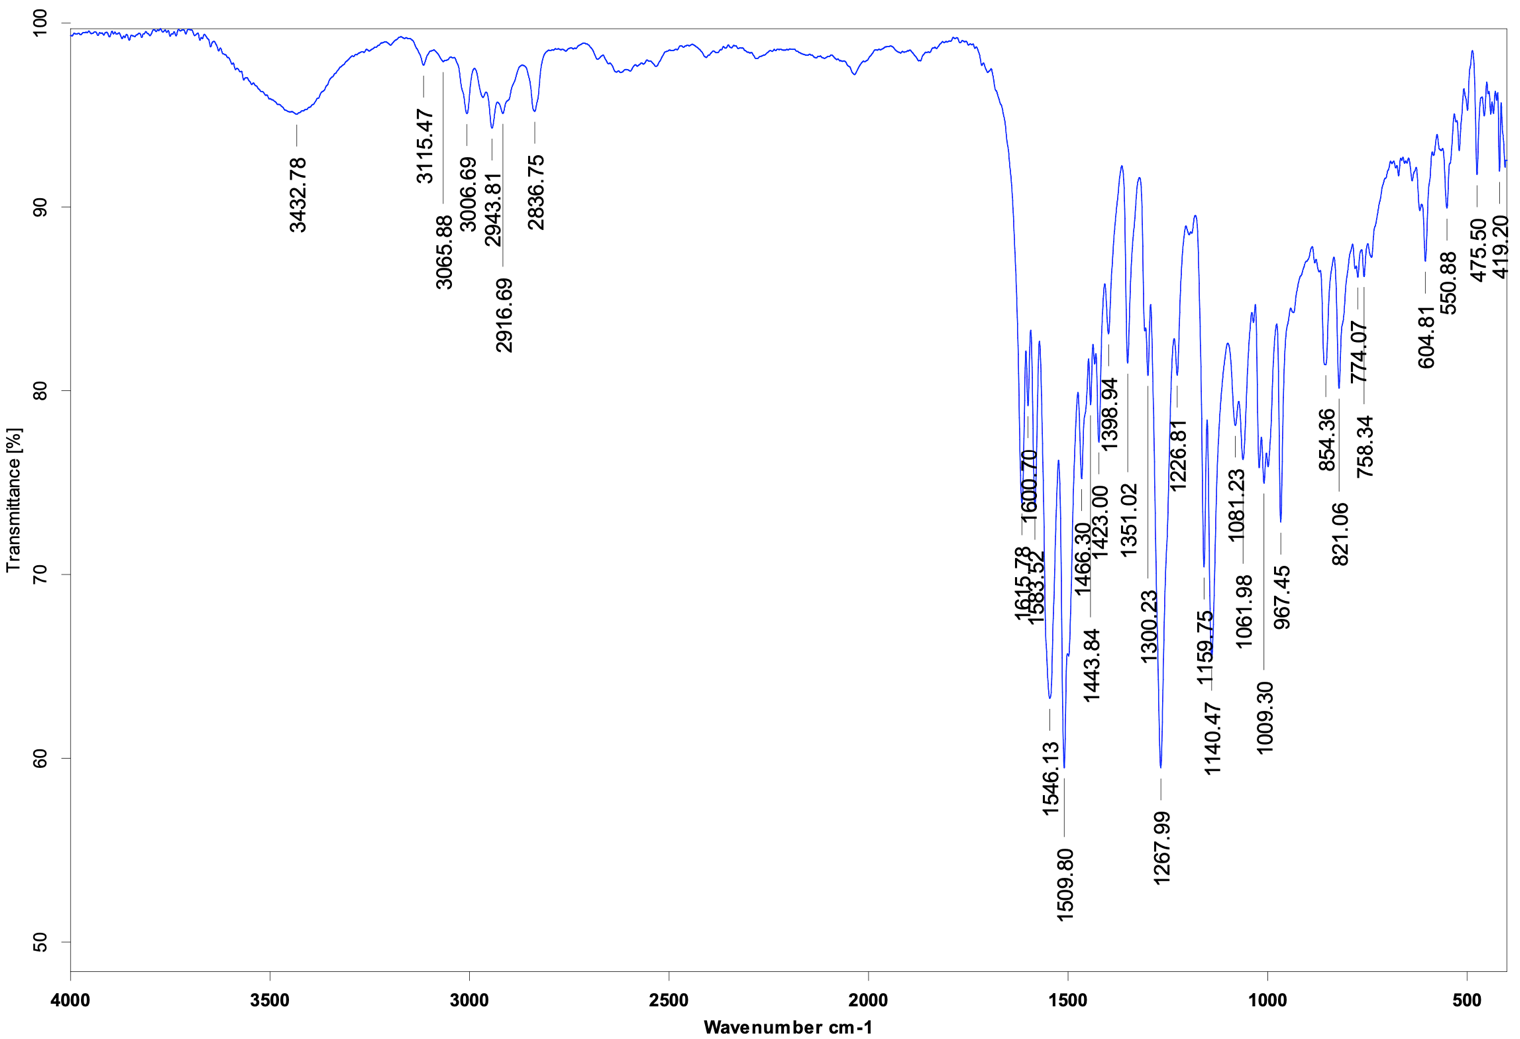
**

# **Fig S3.** IR Spectrum of DiMeOC-BF2.

# **
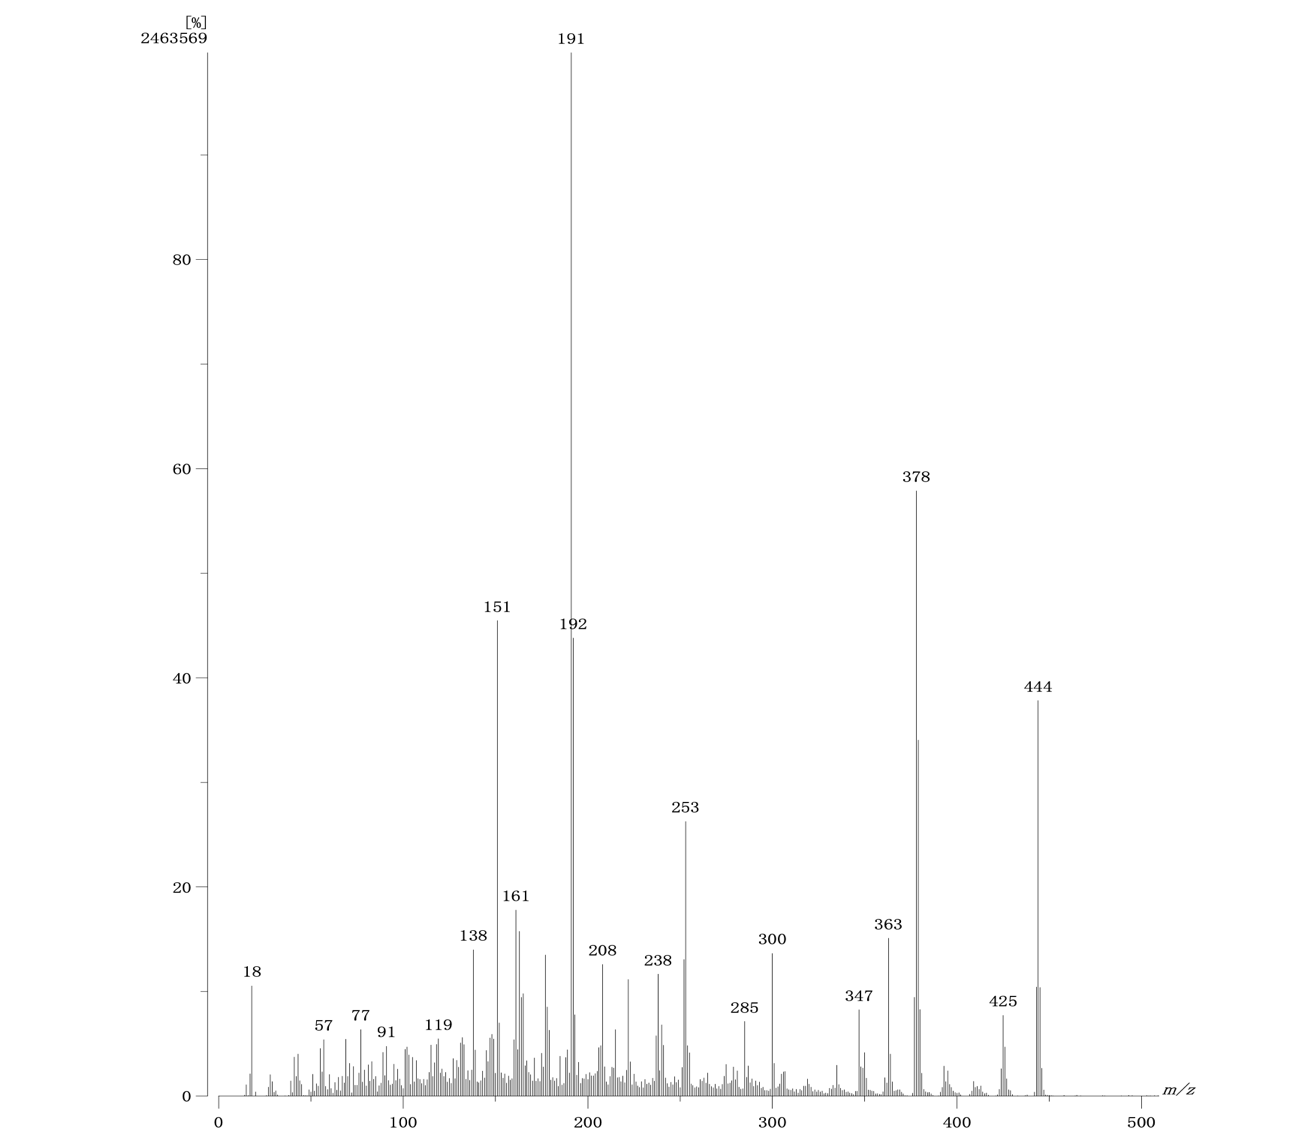
**

# **Fig S4.** Mass Spectrum of DiMeOC-BF2 (IE+).

# **Fig S5.** 1H NMR spectrum of DiMeOC (400 MHz, DMSO- *d*6).

# **Fig S6.** 13C NMR spectrum of DiMeOC (100 MHz, DMSO- *d*6).

# **
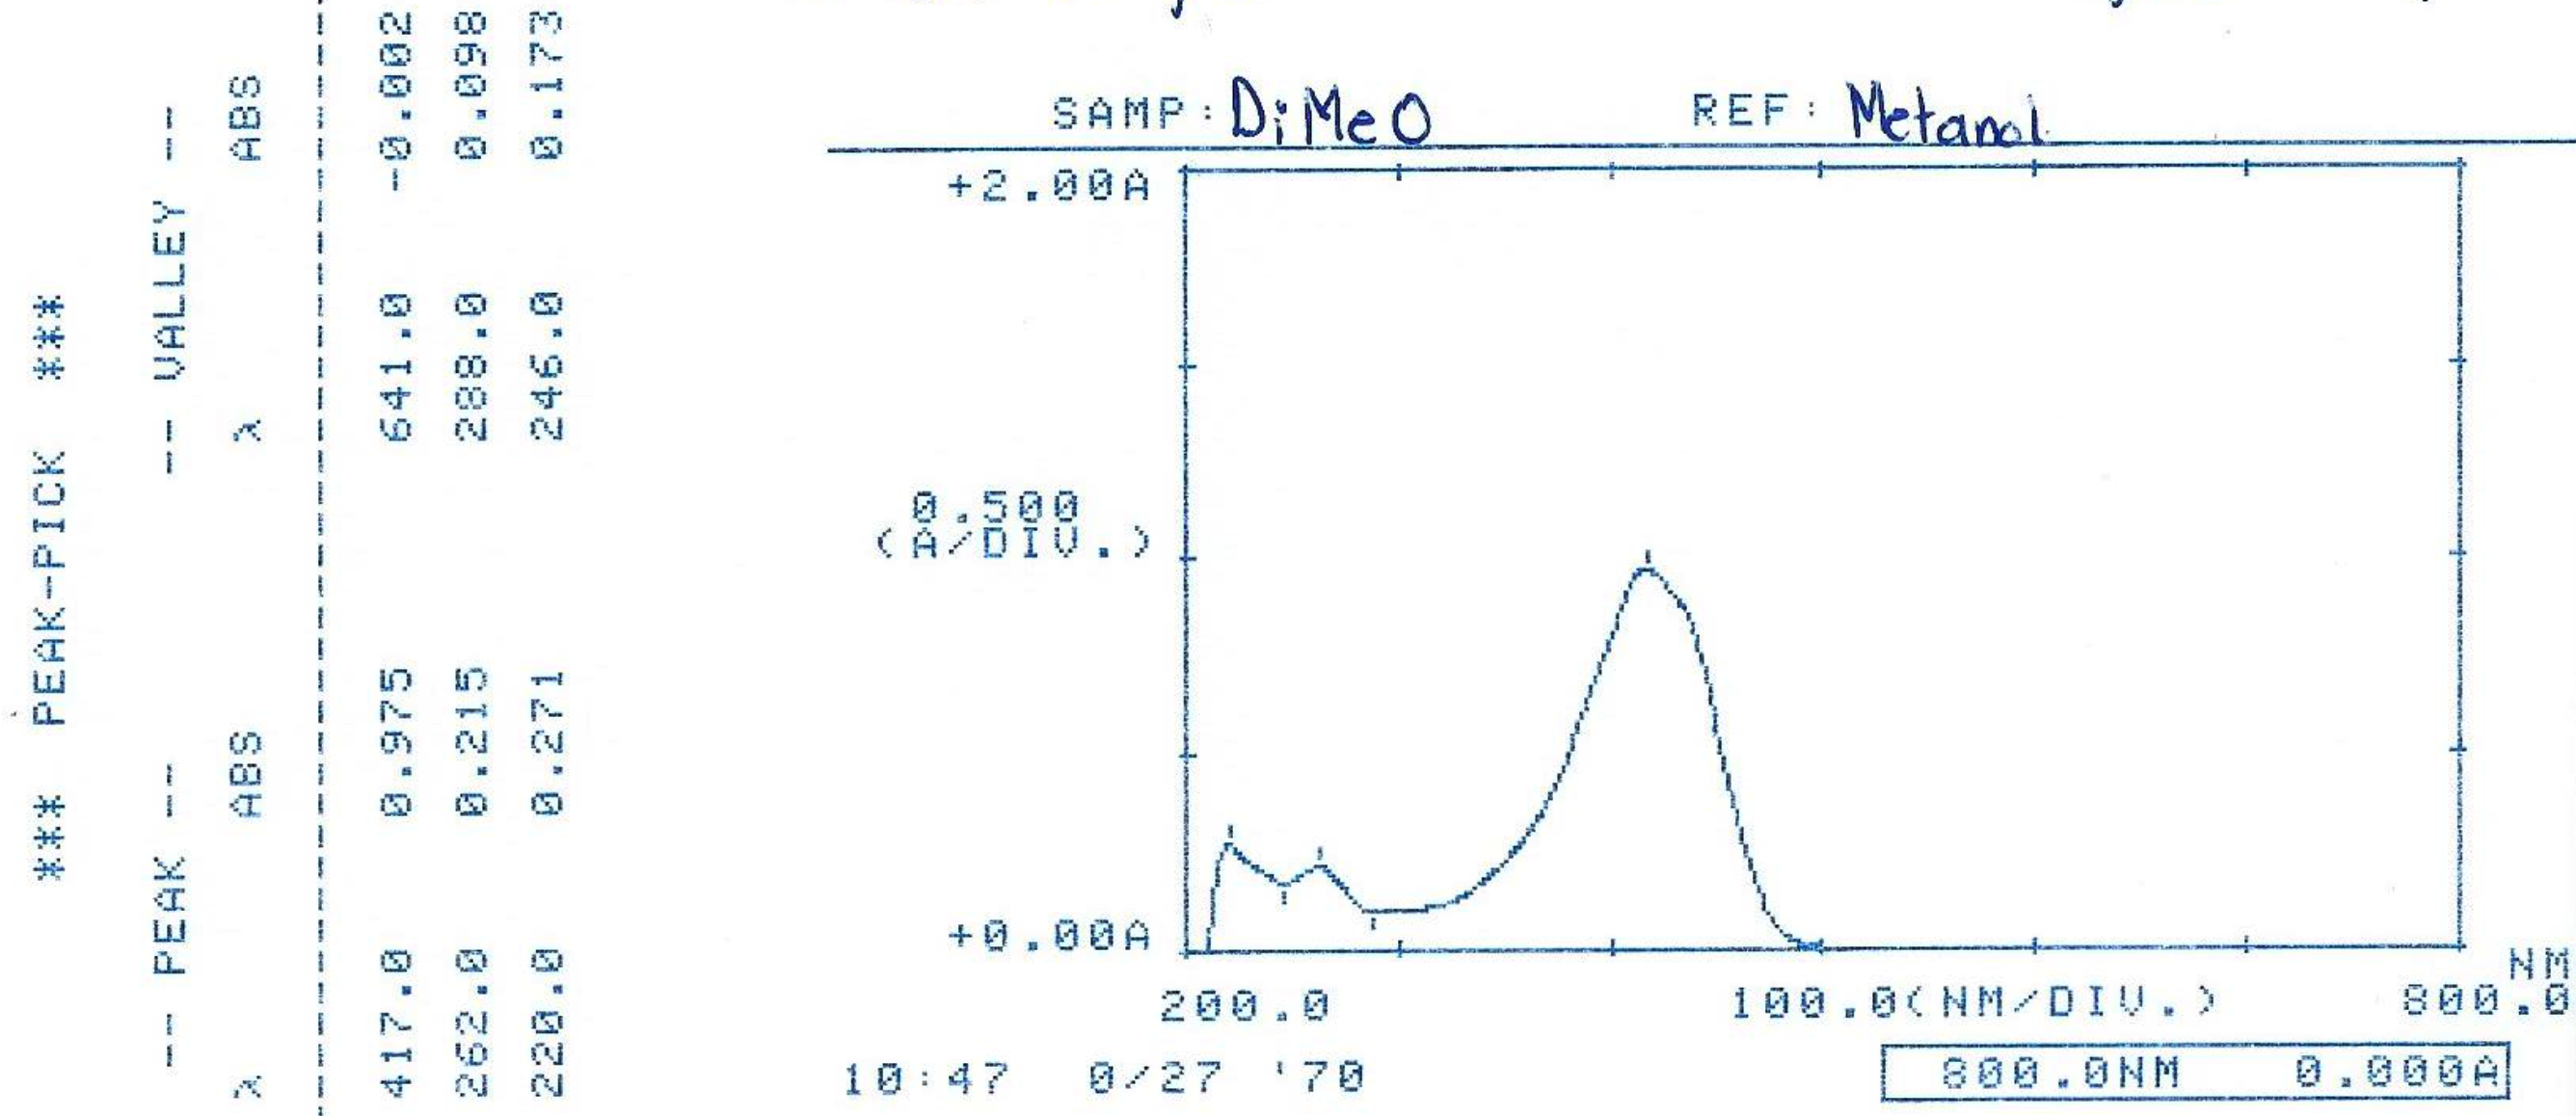
**

# **Fig S7.** UV-VIS spectrum in methanol of DiMeOC.


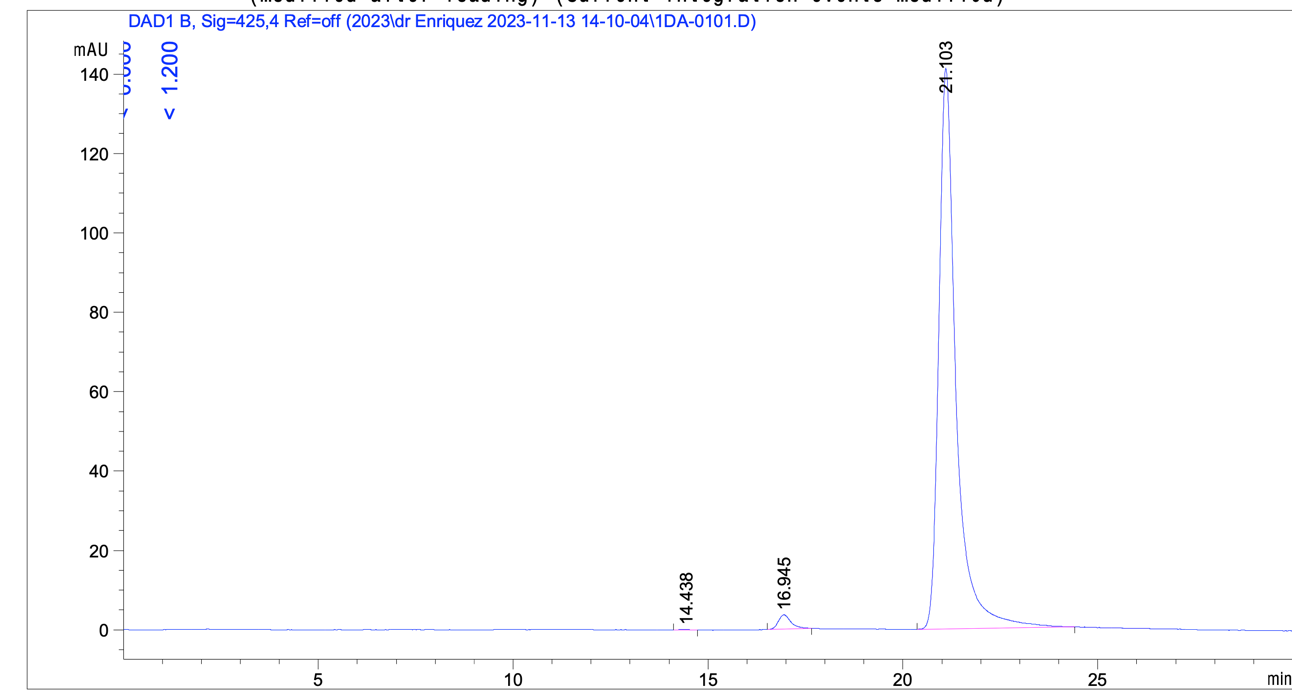


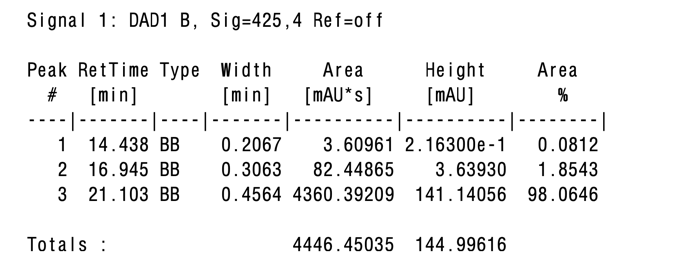


# **Fig S8.** HPLC spectrum of DiMeOC (417nm, CH3CN/H2O (0.02% formic acid) 55:45)


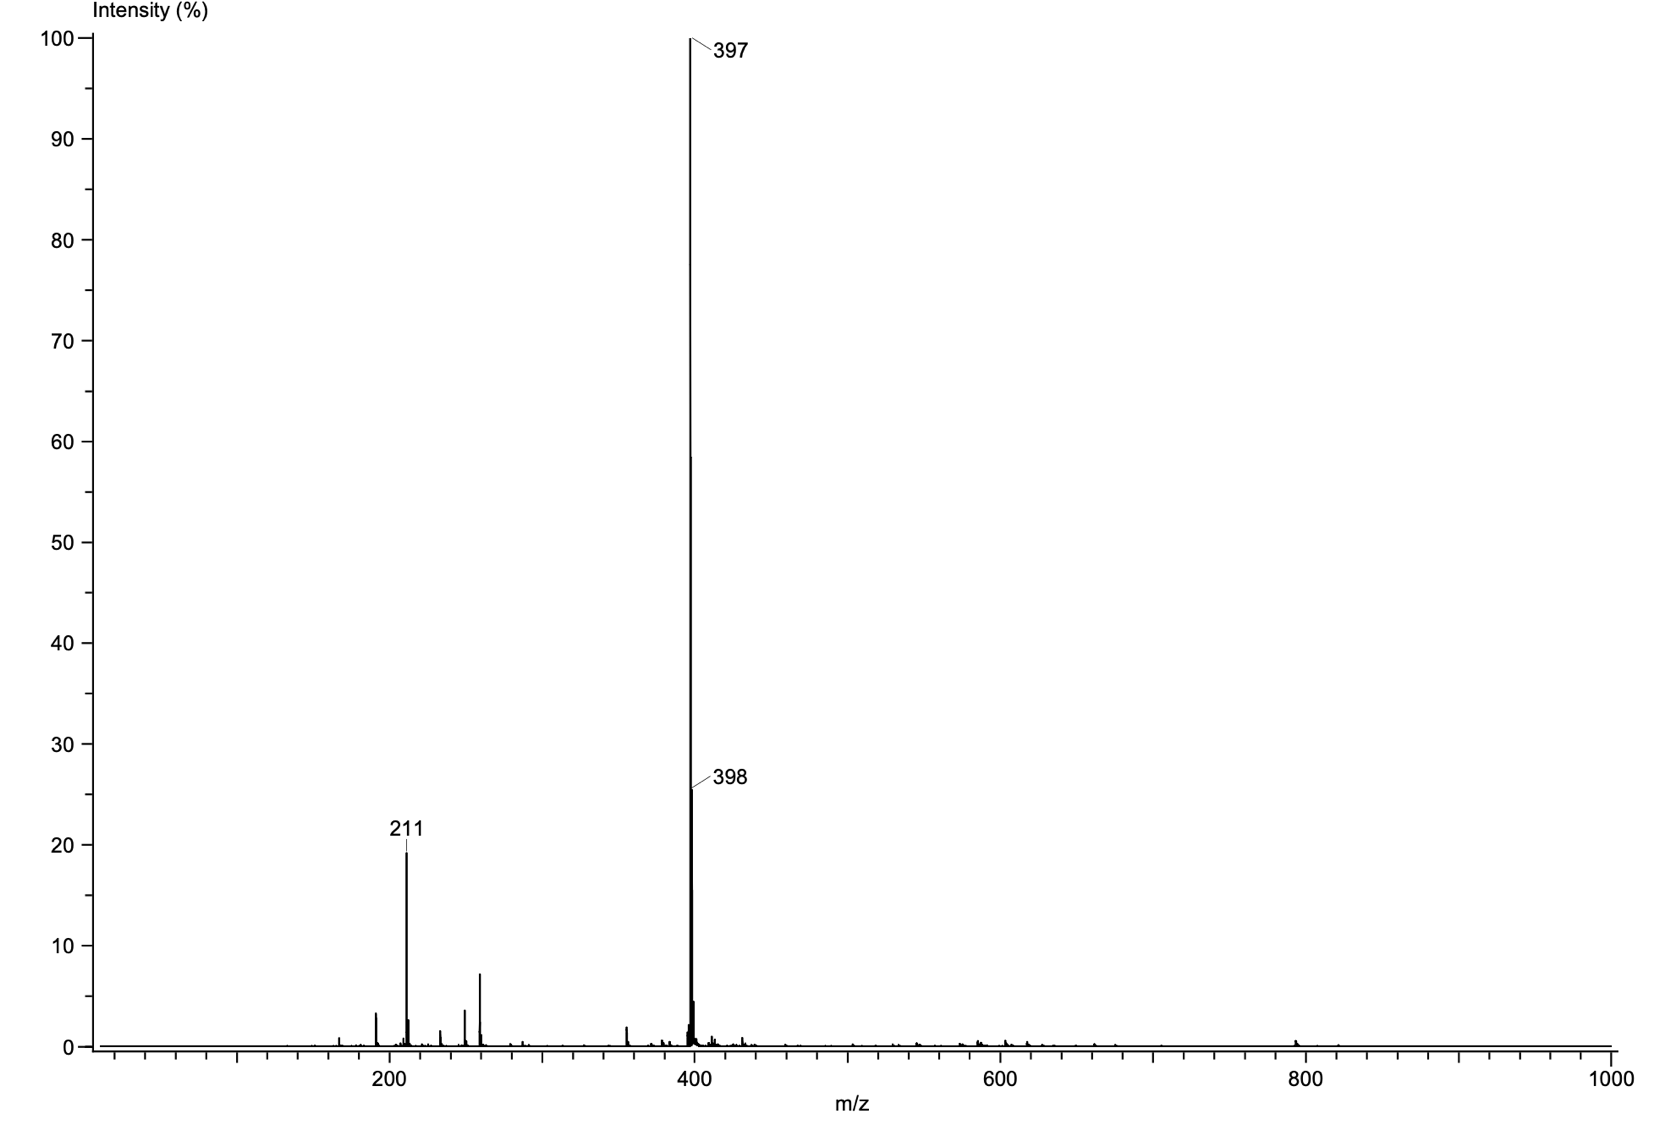


# **Fig S9.** Mass Spectrum of DiMeOC (DART+).

#

# **Fig S10**. 1H NMR spectrum of DiMeOC-Mg (400 MHz, DMSO- *d*6)

#

# **Fig S11.** 13C NMR spectrum of DiMeOC-Mg (100 MHz, DMSO-*d*6).

# **Fig S12.**HSQC NMR spectrum of DiMeOC-Mg (400 MHz, DMSO-*d*6).

# **Fig S13.** HMBC NMR spectrum of DiMeOC-Mg (400 MHz, DMSO-*d*6).

# **
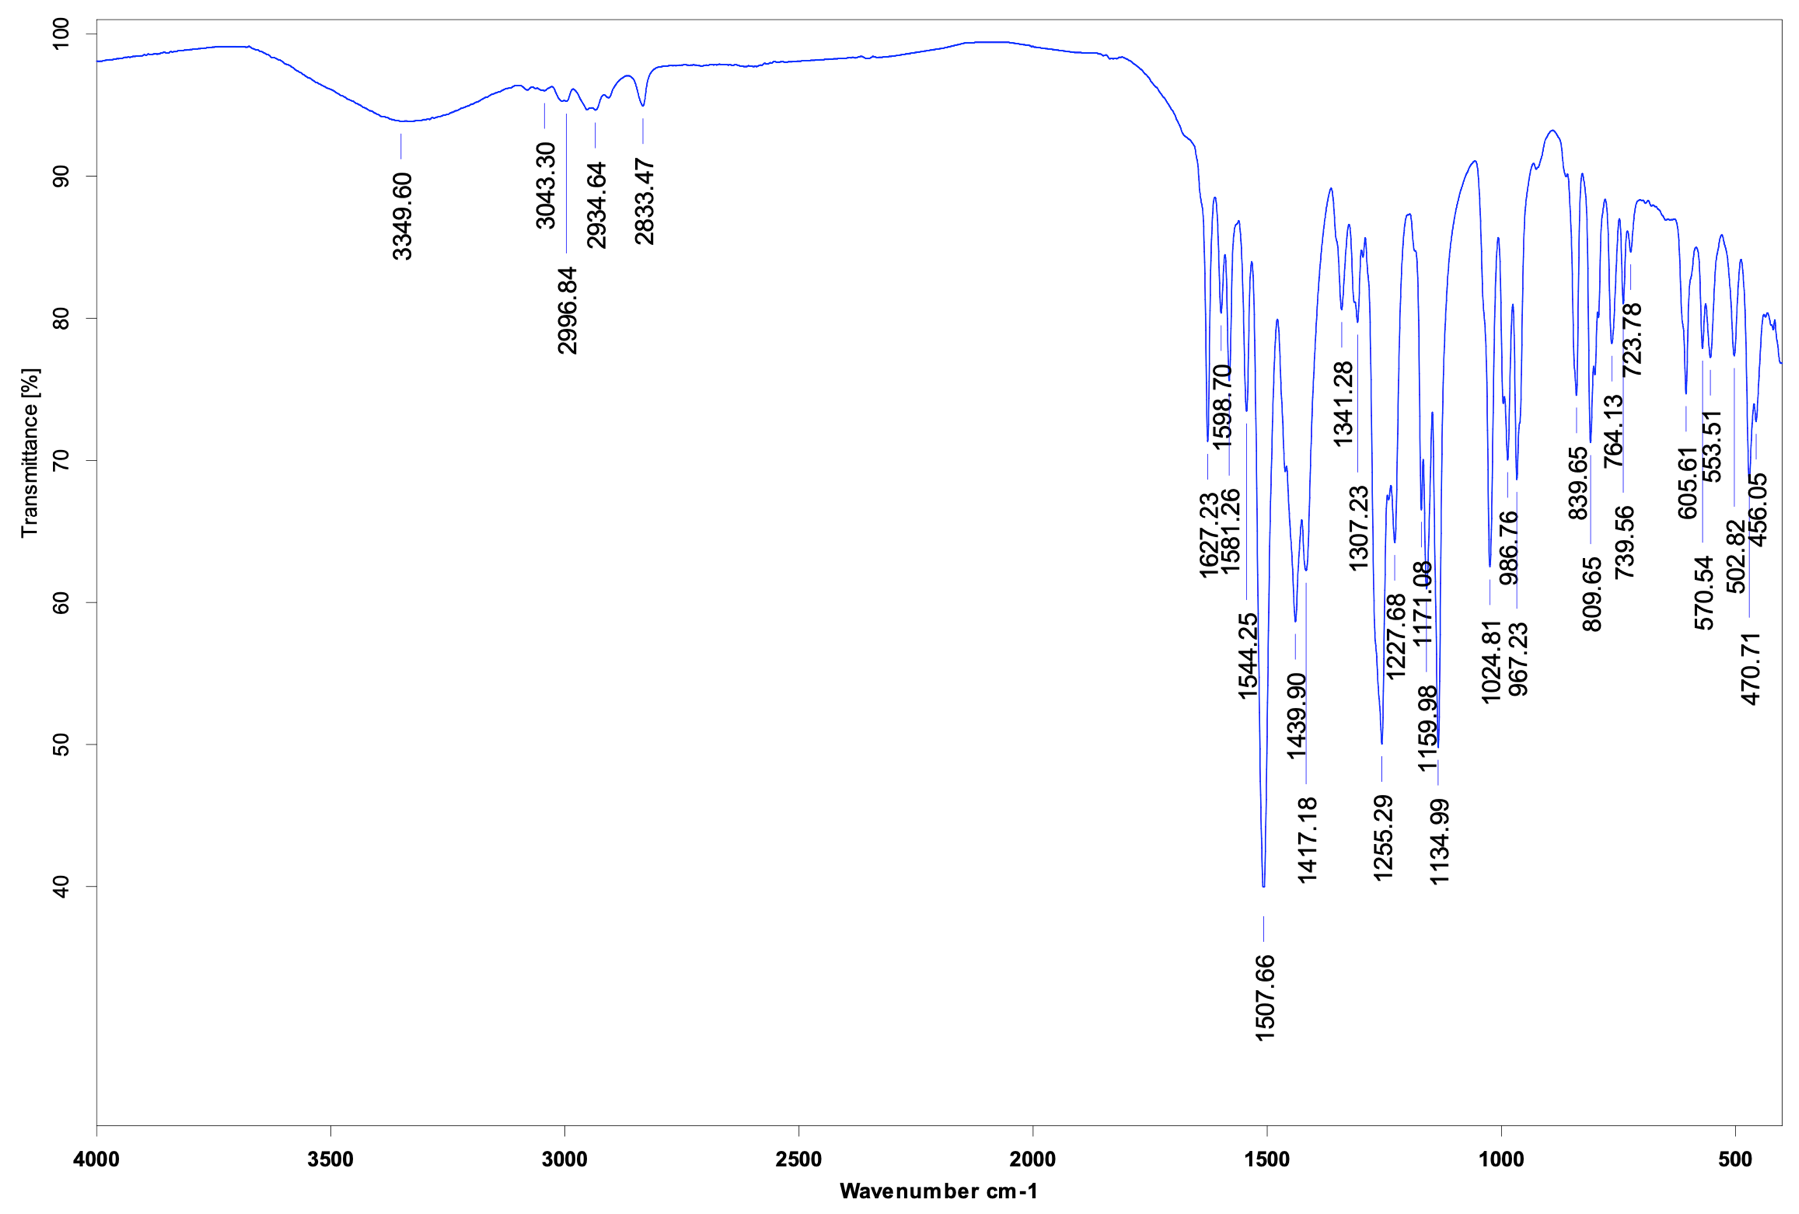
**

# **Fig S14.** IR Spectrum of DiMeOC-Mg.

# **
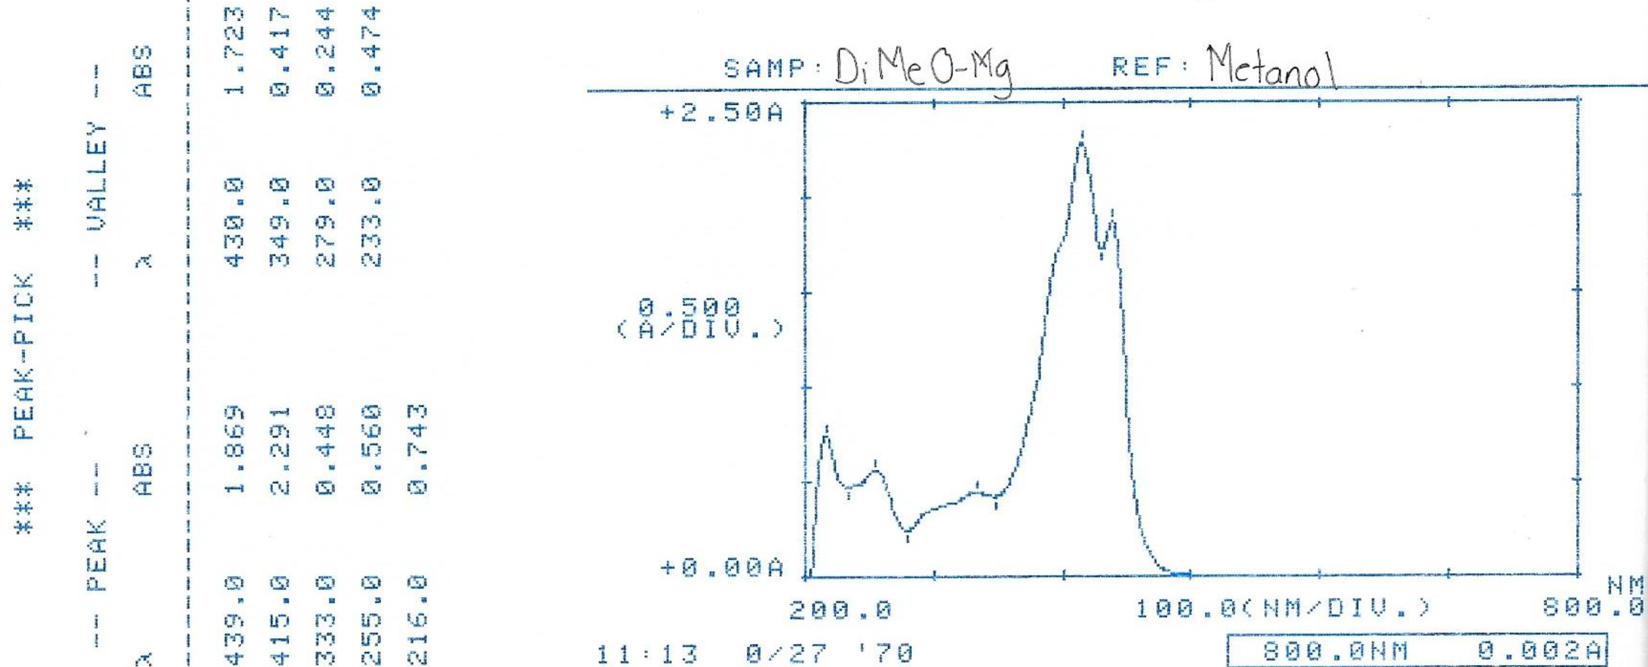
**

# **Fig S15.** UV-VIS spectrum in methanol of DiMeOC-Mg .


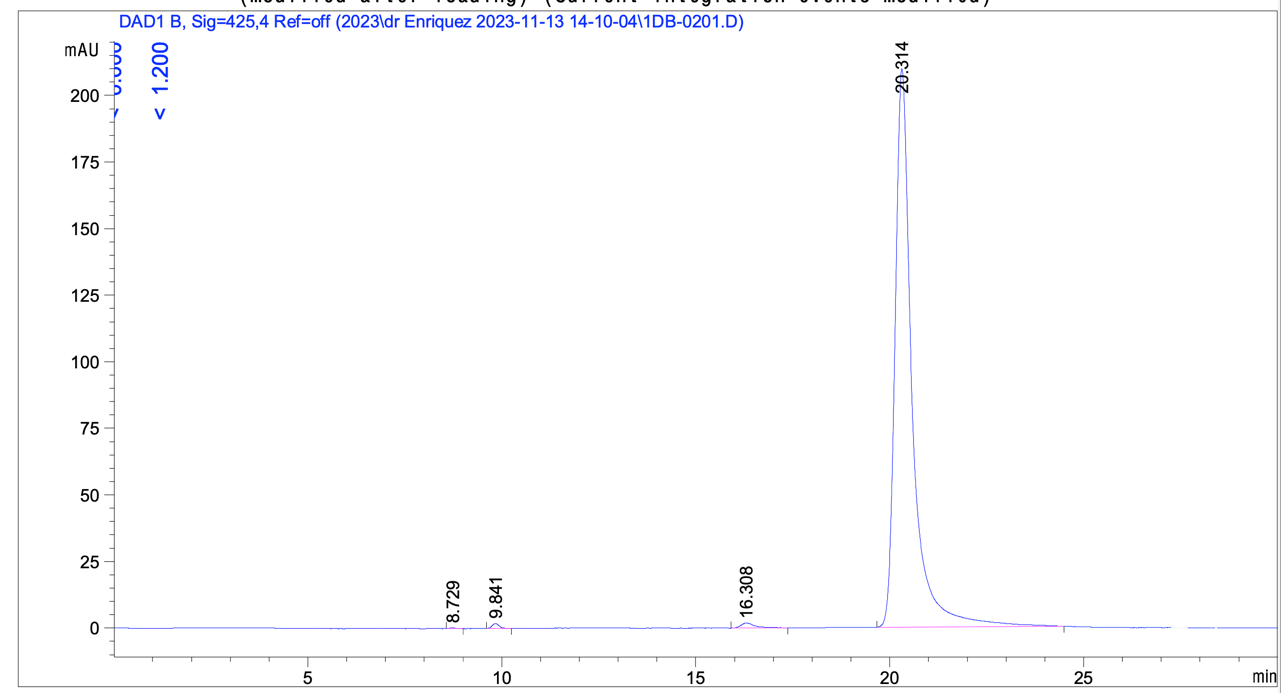


# **Fig S16.** HPLC spectrum of DiMeOC-Mg (417 nm, CH3CN/H2O (0.02% formic acid) 55:45).


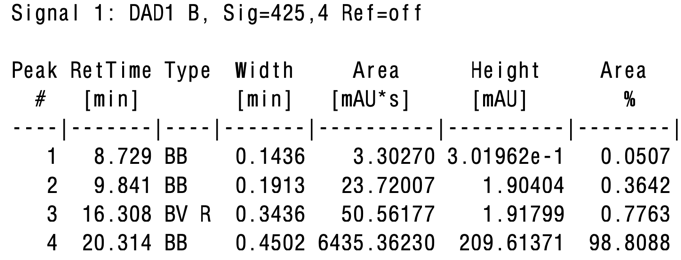


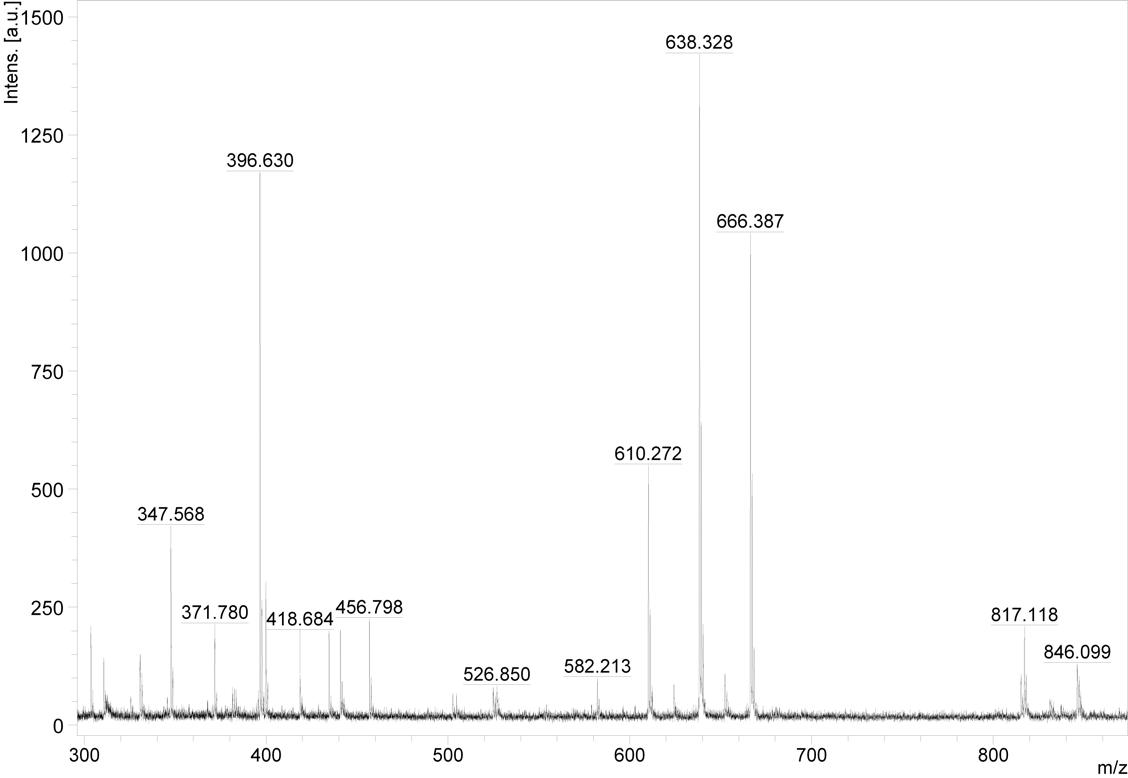


# **Fig S17.** Mass Spectrum of DiMeOC-Mg (MALDI-TOF).

# **Fig S18**. 1H NMR spectrum of DiMeOC-Mg-BCD (400 MHZ, DMSO- *d*6).

#

# **Fig S19.** 13C NMR spectrum of DiMeOC-Mg-BCD (100 MHz, DMSO-*d*6).

# **Fig S20.**HSQC NMR spectrum of DiMeOC-Mg-BCD (400 MHz, DMSO-*d*6).

# **Fig S21.** HMBC NMR spectrum of DiMeOC-Mg-BCD (400 MHz, DMSO-*d*6).

# **
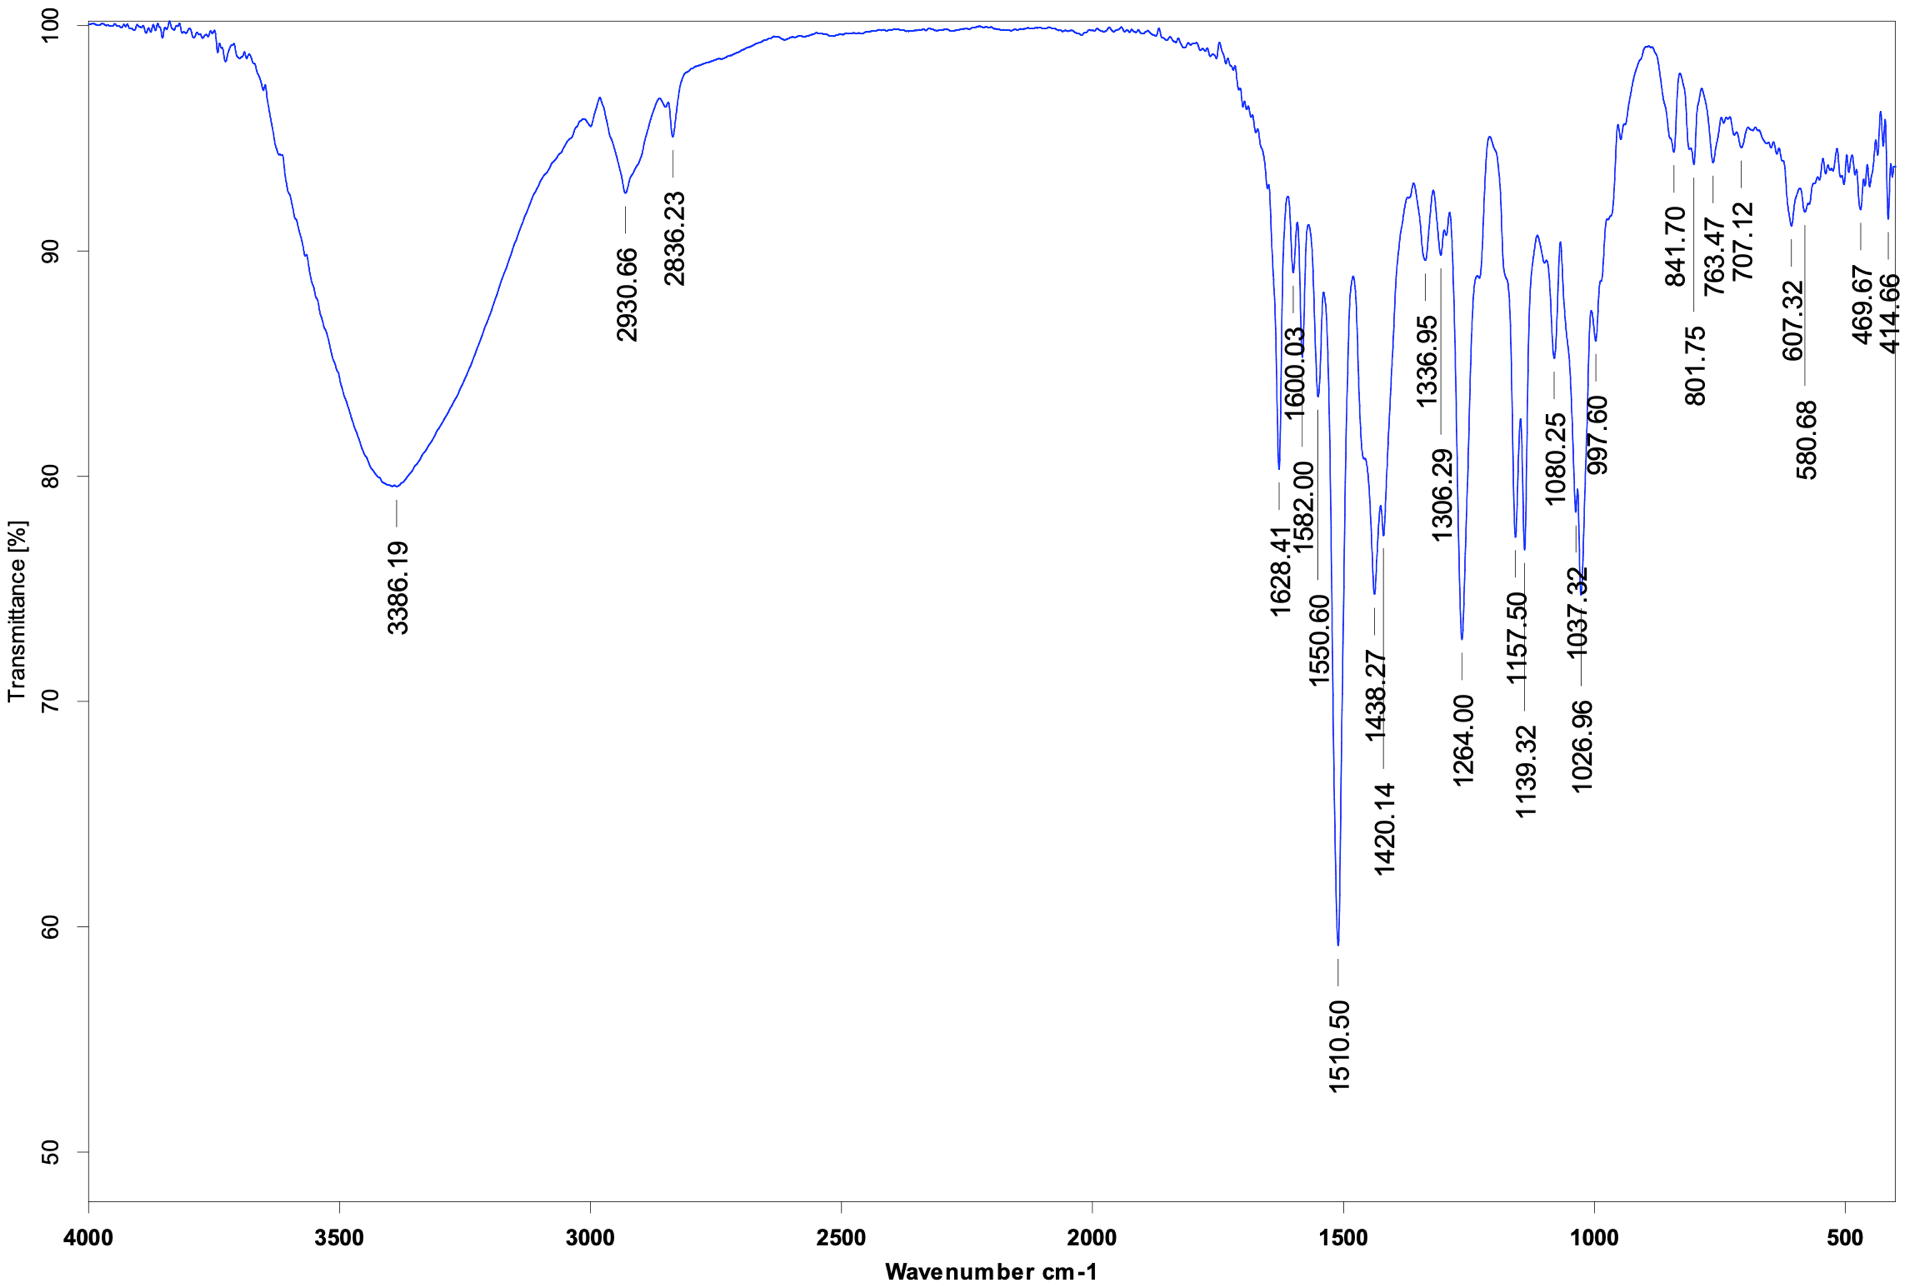
**

# **Fig S22.** IR Spectrum of DiMeOC-Mg-BCD.


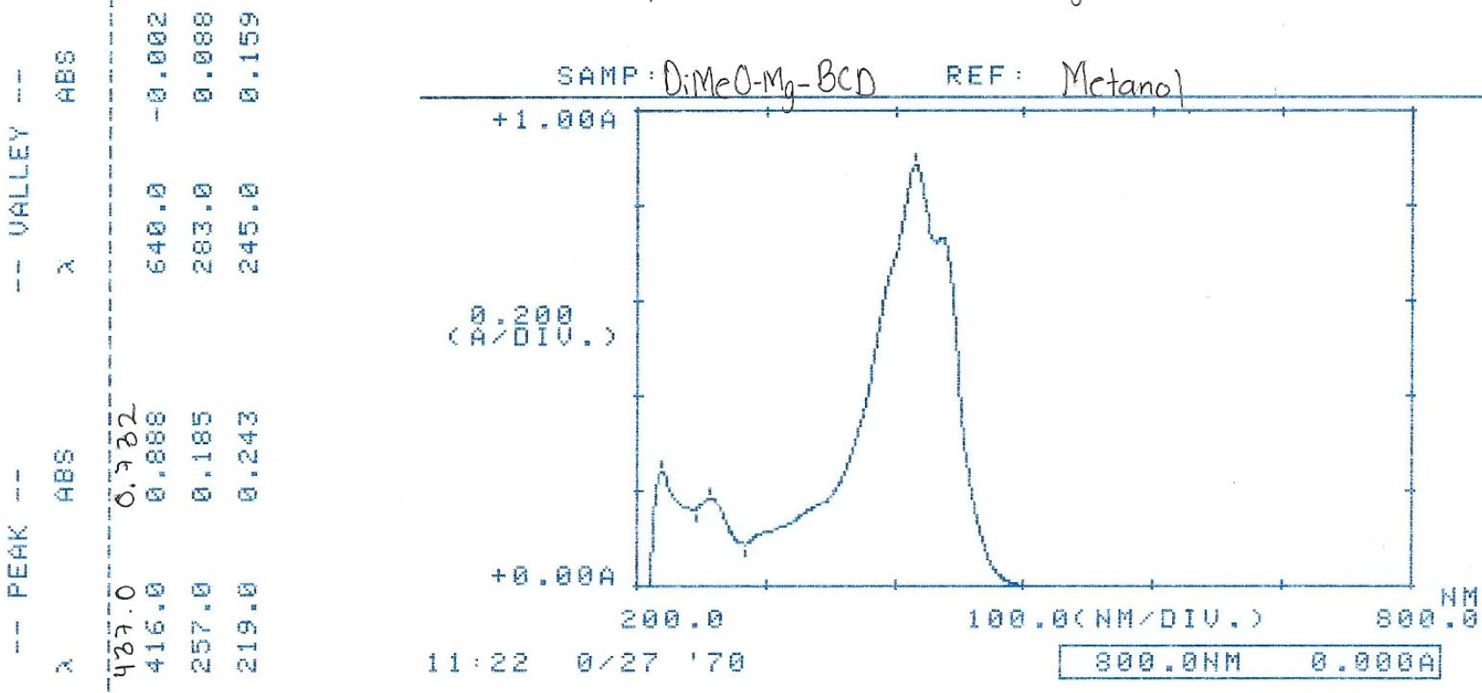


# **Fig S23.** UV-VIS spectrum in methanol of DiMeOC-Mg-BCD .

**
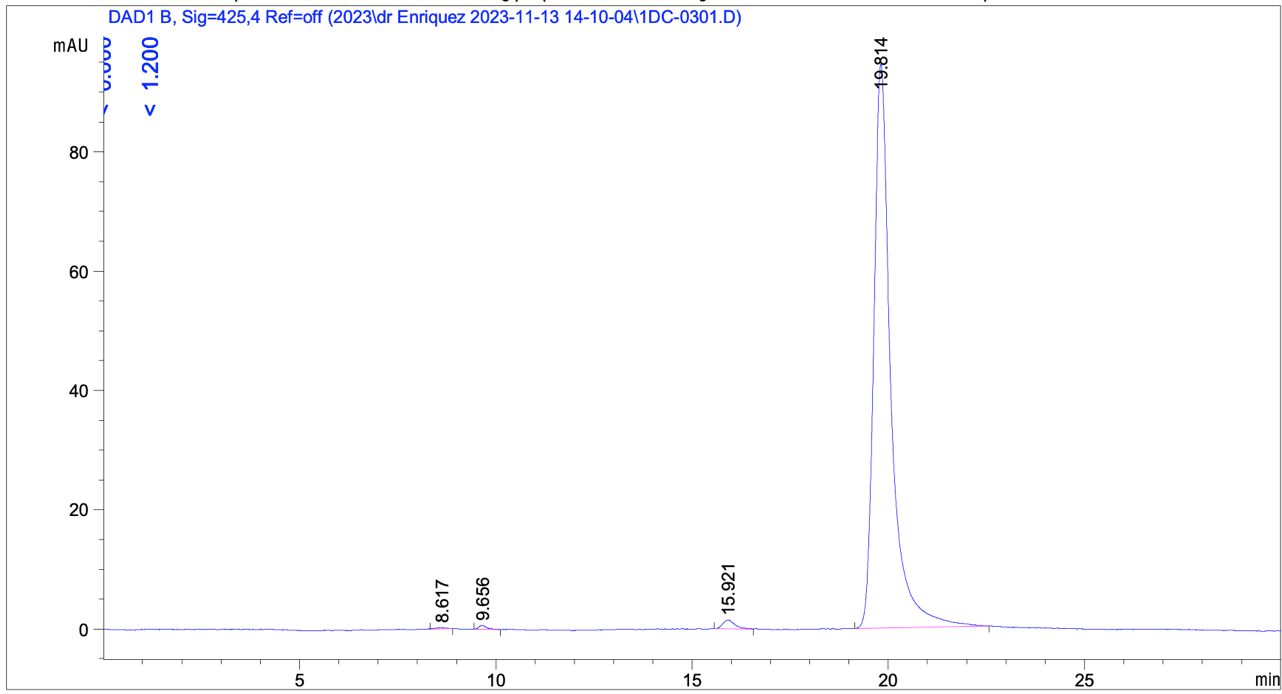
**

# **Fig S24.** HPLC spectrum of DiMeOC-Mg-BCD (417nm, CH3CN/H2O (0.02% formic acid) 55:45).


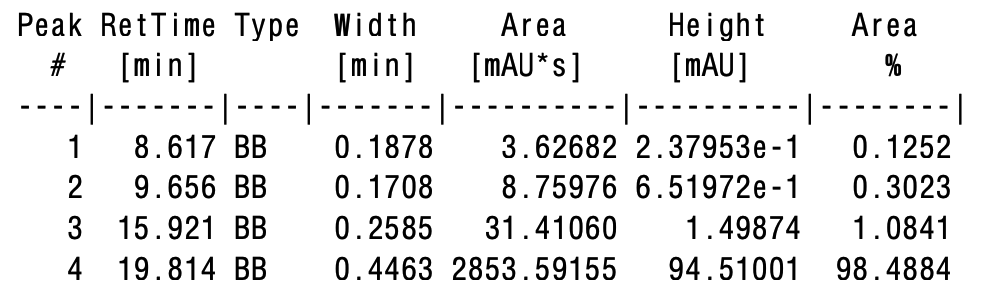


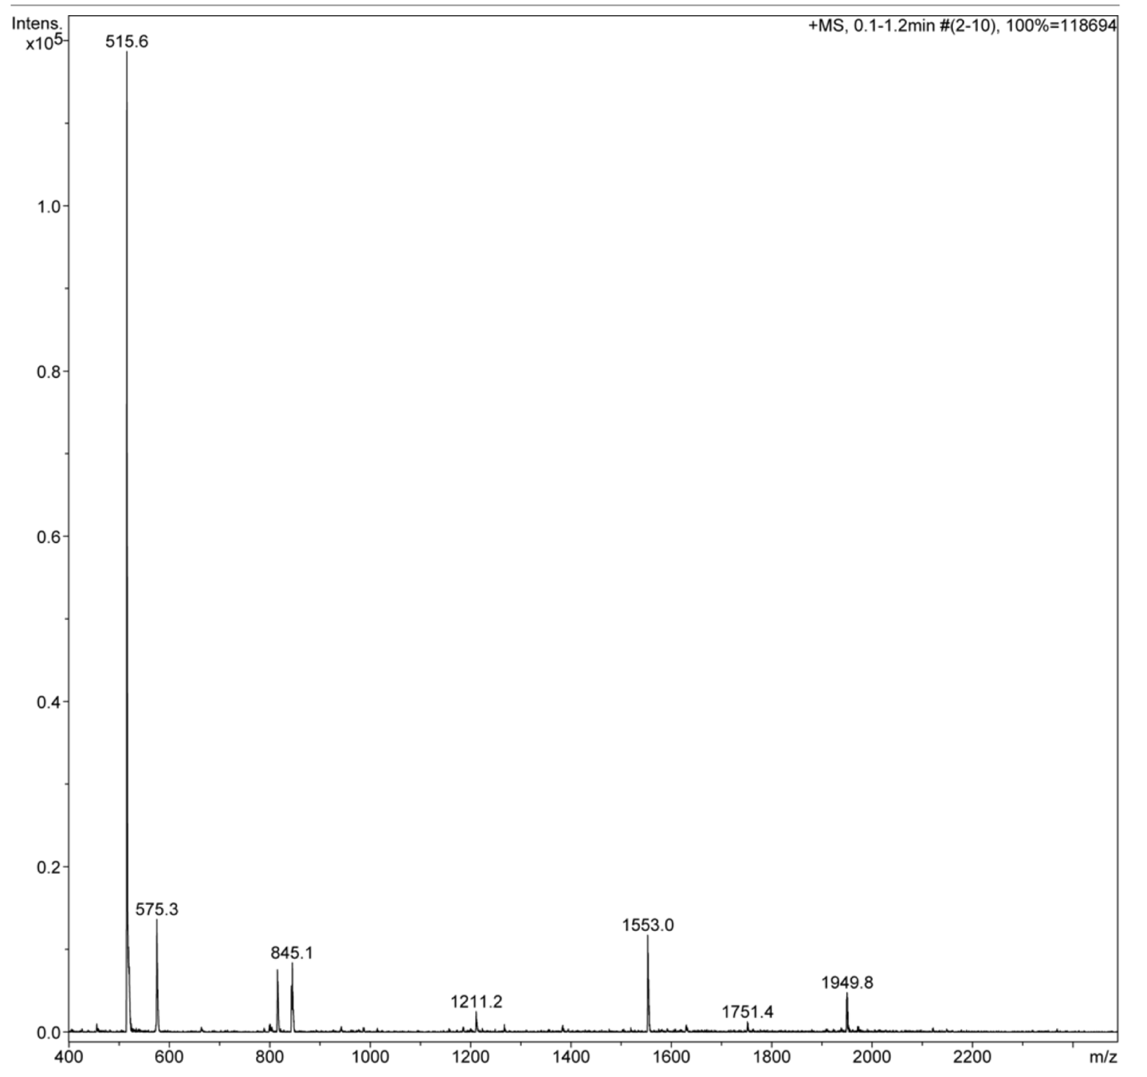


# **Fig S25.** Mass Spectrum of DiMeOC-Mg-BCD (ESI).


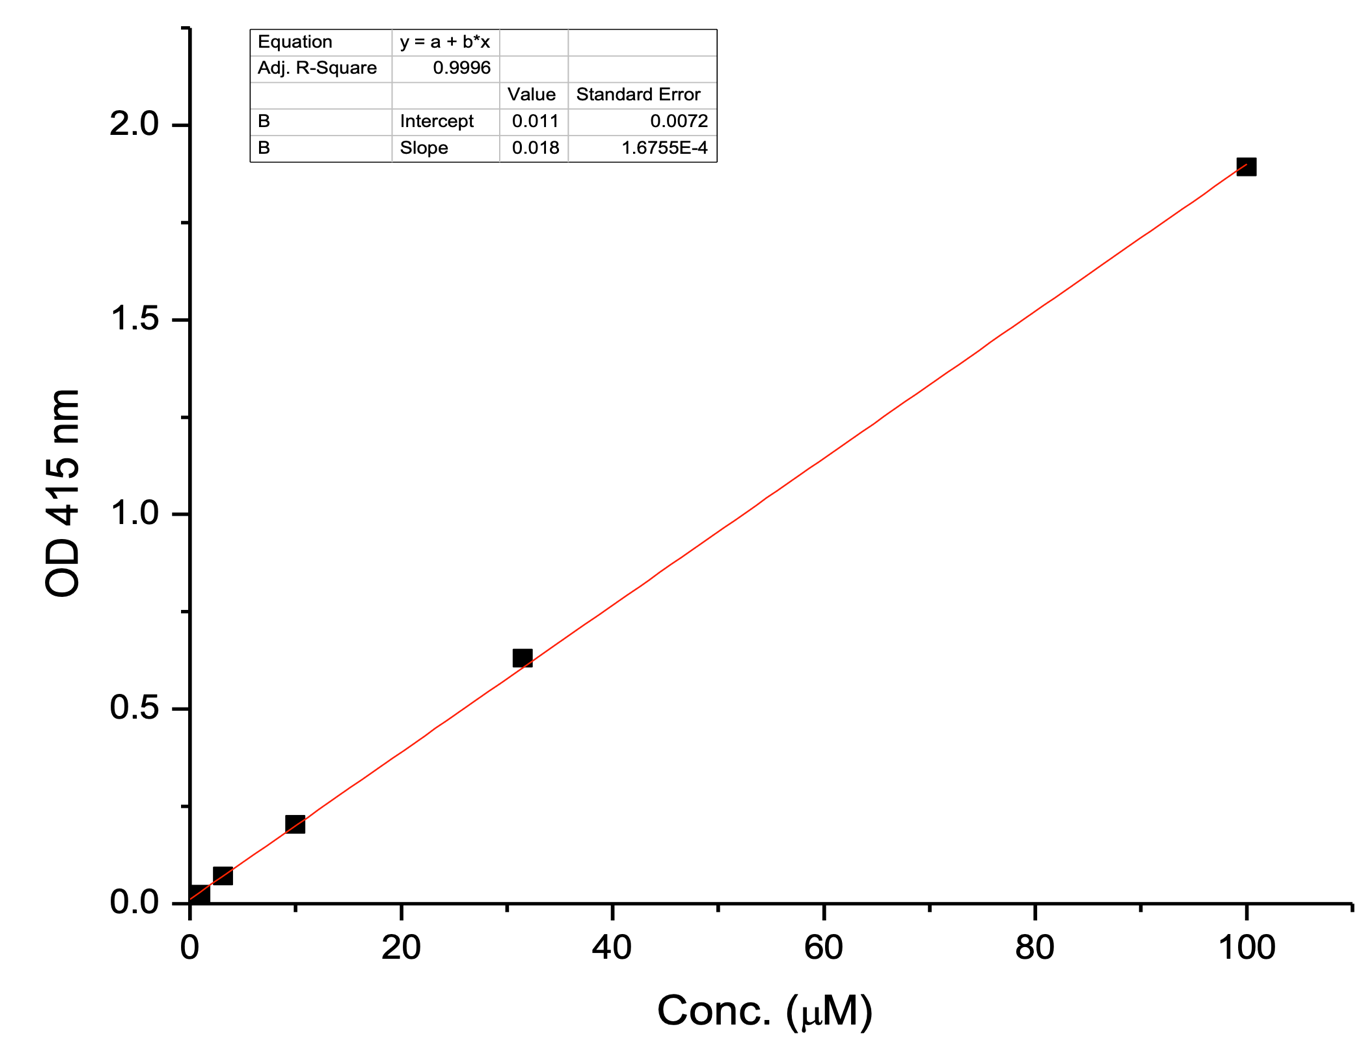


# **Fig S26.** Standard curve of DiMeOC-Mg (415nm, 1-Octanol).


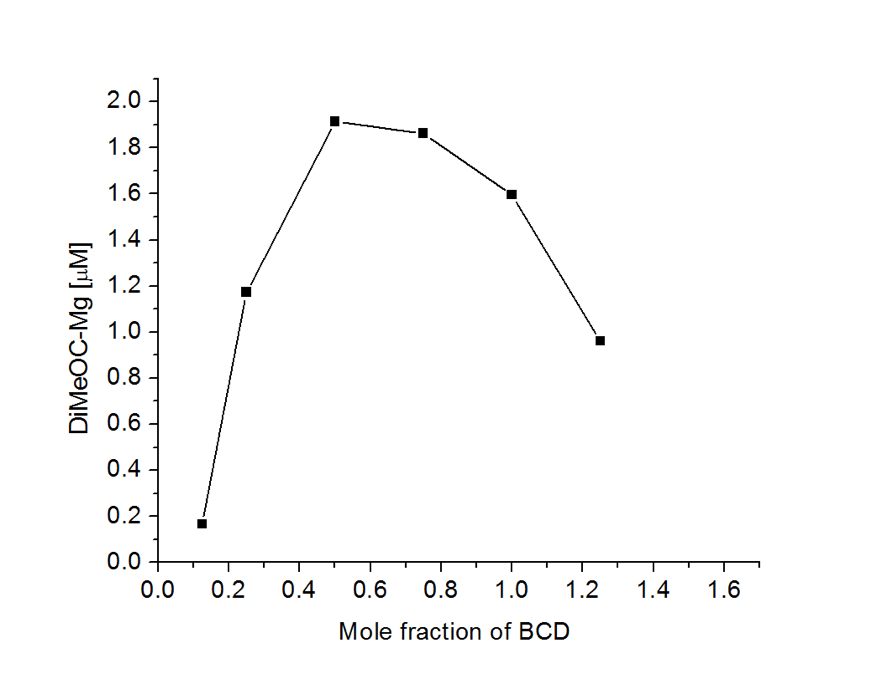


# **Fig S27.** Inclusion ratio DiMeOC-Mg and BCD (PBS media).

The inclusion ratio test results between DiMeOC-Mg and BCD are shown in Fig. s27. The mole fraction represents r of BCD in the mixture. when r = 0.5, the molar concentration value of DiMeOC-Mg was the largest, concluding that the inclusion complex was formed to the molar ratio of 1:1.

#

# **Fig S28.** 1H NMR spectrum of Beta-cyclodextrin (BCD, 400 MHz, DMSO- *d*6).

# **Fig S29.** 13C NMR spectrum of BCD (100 MHz, DMSO-*d*6).

# **Fig S30.**HSQC NMR spectrum of BCD (500 MHz, DMSO-*d*6).

#

# **Fig S31.** HMBC NMR spectrum of BCD (500 MHz, DMSO-*d*6).


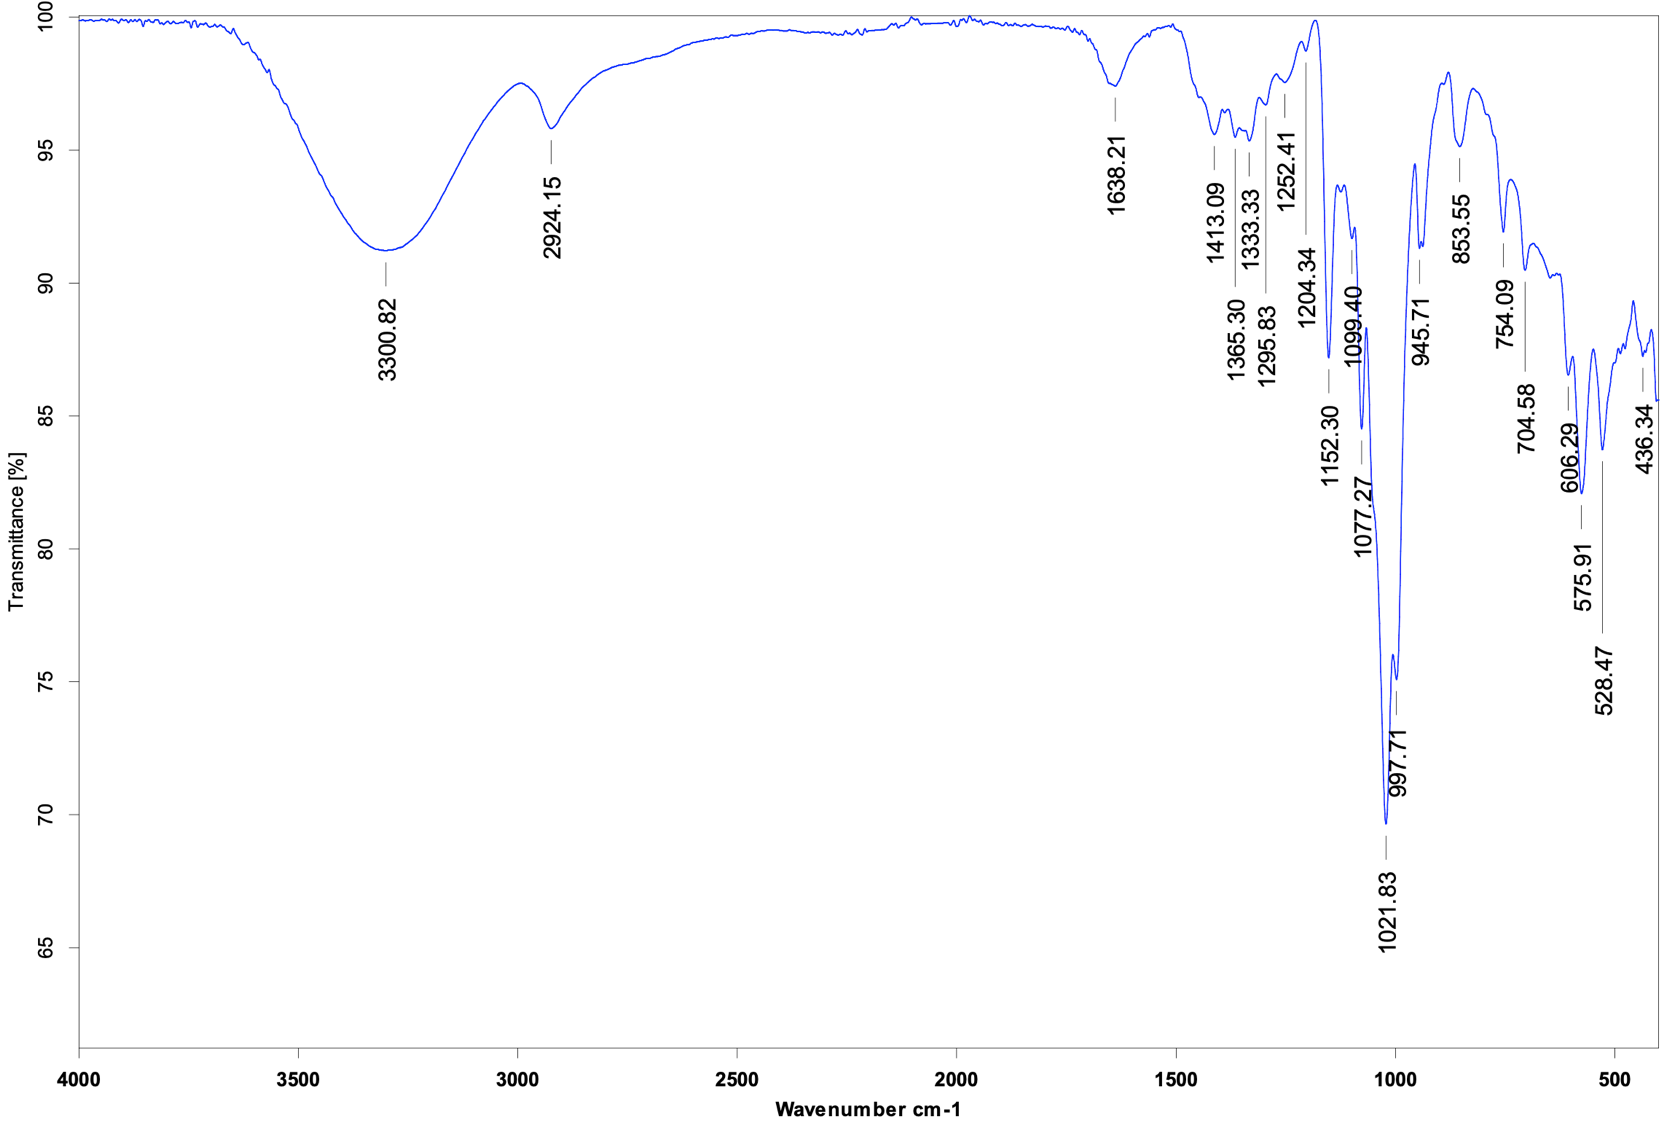


# **Fig S32.** IR Spectrum of BCD.
